# Supplementary material
Source: MDPI journal article supplement (https://www.mdpi.com/1999-4907/13/9/1511)
Supplement: s1 [file s1]

**Supplementary Figure S1. Gain of Heterozygosity ( $GoH_e$ ) associated with sequencing based errors causes deviations from Hardy Weinberg Equilibrium. (A) The  $GoH_e$  in the IUFRO population without HWE filters and (B) elimination of  $GoH_e$  with filtering on HWE ( $p>0.0001$ ).**

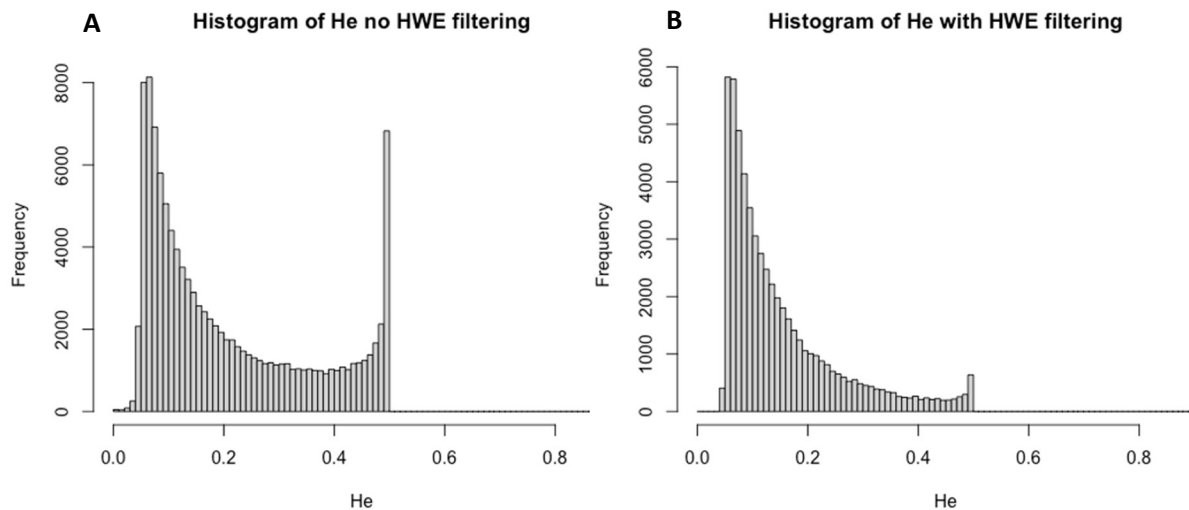

**Supplementary Figure S2. Optimal clusters as determined by Bayesian Information Criterion (BIC).** Number of clusters within the population ( $K$ ) was determined from a sample size of 1177 using 36567 SNPs for Bayesian clustering.

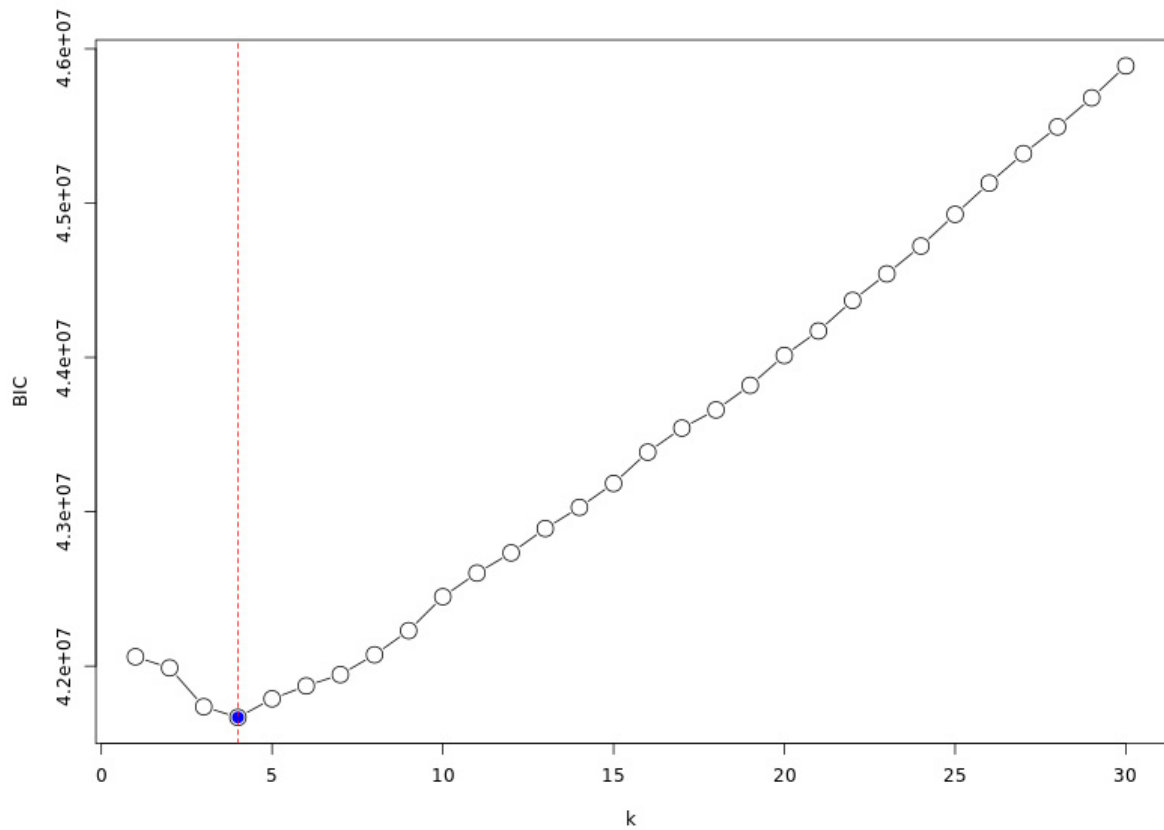

**Supplementary Table S1. Provenances and their respective geographic regions.**

Provenances are ordered from North to South based off their latitudinal coordinates.

Coordinates recorded in decimal.

| Provenance       | Geographic Region | Longitude | Latitude |
|------------------|-------------------|-----------|----------|
| Valdez           | North Alaska      | -146.233  | 61.11667 |
| Cordova          | North Alaska      | -145.75   | 60.55    |
| Eyak Lake        | North Alaska      | -145.667  | 60.55    |
| Sheridan Glacier | North Alaska      | -145.333  | 60.51667 |
| Seward           | North Alaska      | -149.533  | 60.16667 |
| Haning Bay       | Montague Island   | -147.717  | 59.96667 |
| McLeod Harbor    | Montague Island   | -147.833  | 59.88333 |
| Yakutat          | North Alaska      | -139.7    | 59.51667 |
| Kodiak Island    | Kodiak Island     | -152.417  | 58.76667 |
| Eagle River      | North Alaska      | -134.8    | 58.51667 |
| Dyea             | North Alaska      | -135.35   | 58.5     |
| Duck Creek       | North Alaska      | -134.633  | 58.36667 |

|                    |                         |          |          |
|--------------------|-------------------------|----------|----------|
| Afognack Island    | North Alaska            | -152.883 | 56.1     |
| Derrick Lake       | Upper Naas Rivers       | -133.683 | 55.68333 |
| Ohmer Creek        | South Alaska            | -128.733 | 55.58333 |
| Craig              | South Alaska            | -128.133 | 55.5     |
| Old Hollis         | South Alaska            | -131.667 | 55.46667 |
| Cranberry River    | Upper Naas Rivers       | -128.233 | 55.46667 |
| Ward Lake          | South Alaska            | -127.7   | 55.41667 |
| Dragon Lake        | Upper Naas Rivers       | -129.95  | 55.35    |
| Kitwanga           | Upper Naas Rivers       | -128.867 | 55.16667 |
| Zolap Creek        | Lower Naas Rivers       | -131.217 | 55.15    |
| Fulmar Creek       | Lower Naas Rivers       | -128.967 | 55.15    |
| Moss Point         | South Alaska            | -131.55  | 55.03333 |
| Cedarvale          | Upper Skeena River      | -128.3   | 55.01667 |
| Vesach Creek       | Middle Skeena River     | -128.717 | 54.8     |
| Pacific            | Upper Skeena River      | -128.25  | 54.76667 |
| Kitsum Kalum       | Middle Skeena River     | -128.767 | 54.71667 |
| Usk Ferry          | Middle Skeena River     | -128.4   | 54.63333 |
| Shames             | Middle Skeena River     | -128.95  | 54.4     |
| Kasiks River       | Lower Skeena River      | -129.417 | 54.28333 |
| Inverness          | Lower Skeena River      | -130.25  | 54.2     |
| Aberdeen           | Lower Skeena River      | -129.917 | 54.2     |
| Weden River        | Middle Skeena River     | -128.617 | 54.05    |
| Humpback Creek     | Lower Skeena River      | -130.367 | 54.03333 |
| Chittenden Point   | Haida Gwaii             | -132.6   | 53.95    |
| Masset Sound       | Haida Gwaii             | -132.083 | 53.91667 |
| Ain River          | Haida Gwaii             | -132.417 | 53.73333 |
| Dinan Bay          | Haida Gwaii             | -132.667 | 53.66667 |
| Tlell              | Haida Gwaii             | -131.933 | 53.58333 |
| Link Road          | Haida Gwaii             | -132.167 | 53.5     |
| Copper Creek       | Haida Gwaii             | -131.8   | 53.13333 |
| Moresby Camp       | Haida Gwaii             | -132.067 | 53.05    |
| Tasu Creek         | Haida Gwaii             | -132.083 | 52.86667 |
| Jedway             | Haida Gwaii             | -131.217 | 52.28333 |
| Kilbella river     | Costal British Columbia | -127.317 | 51.78333 |
| Noeick River       | Costal British Columbia | -126.833 | 51.76667 |
| Holberg            | Vancouver Island        | -128.083 | 50.6     |
| Salmon Bay         | Vancouver Island        | -125.95  | 50.38333 |
| Fair Harbor        | Vancouver Island        | -127.033 | 50.05    |
| Squamish River     | Costal British Columbia | -123.25  | 49.88333 |
| Thasis Inlet       | Vancouver Island        | -126.667 | 49.83333 |
| Big Qualicum River | Vancouver Island        | -124.617 | 49.38333 |
| Haney              | Costal British Columbia | -122.6   | 49.26667 |
| Vedder             | Costal British Columbia | -121.933 | 49.11667 |
| Blenhiem Mountain  | Vancouver Island        | -124.95  | 48.9     |

|                    |                    |          |          |
|--------------------|--------------------|----------|----------|
| Bellingham         | Washington straits | -122.633 | 48.75    |
| Port Renfrew       | Vancouver Island   | -124.4   | 48.58333 |
| Muir Creek         | Vancouver Island   | -123.867 | 48.38333 |
| Port Angeles       | Washington straits | -123.733 | 48.15    |
| Stillaguamish road | Washington straits | -123.75  | 48.11667 |
| Forks              | Olympic Peninsula  | -121.3   | 48.06667 |
| Brinnon            | Washington straits | -124.883 | 47.7     |
| Kalaloch           | Olympic Peninsula  | -124.417 | 47.7     |
| Shelton            | Washington straits | -122.15  | 47.35    |
| Humtulpis          | Olympic Peninsula  | -123.95  | 47.23333 |
| Hoquiam            | Olympic Peninsula  | -123.05  | 47.05    |
| Raymond            | Washington         | -124.867 | 46.68333 |
| Naselle            | Washington         | -123.783 | 46.36667 |
| Astoria            | North Oregon       | -123.967 | 46.2     |
| Necanium           | North Oregon       | -123.767 | 45.66667 |
| Tillamook          | North Oregon       | -123.883 | 45.33333 |
| Newport            | Central Oregon     | -124.067 | 44.7     |
| Florence           | Central Oregon     | -124.117 | 44.11667 |
| Denmark            | South Oregon       | -124.45  | 42.85    |
| Gold Beach         | South Oregon       | -124.417 | 42.5     |
| Brookings          | South Oregon       | -124.383 | 42.25    |
| Crescent City      | California         | -124.183 | 41.66667 |
| Big Logoon         | California         | -124.15  | 41.13333 |
